# Supplementary material for: Identification of Phenolic Compounds in Australian-Grown Bell Peppers by Liquid Chromatography Coupled with Electrospray Ionization-Quadrupole-Time-of-Flight-Mass Spectrometry and Estimation of Their Antioxidant Potential
Source: PubMed Central journal article supplement — ACS Omega. 2022 Jan 25;7(5):4563–76. doi: 10.1021/acsomega.1c06532 (PMC8829910; doi:10.1021/acsomega.1c06532), 2022-01-25
Supplement: ao1c06532_si_001.pdf [file ao1c06532_si_001.pdf]

**Supplementary data**

**Identification of Phenolic Compounds in Australian Grown bell peppers by LC-ESI-QTOF-MS/MS and estimation of Their Antioxidant Potential**

Zexing Leng<sup>1</sup>, Biming Zhong<sup>1</sup>, Hanjing Wu<sup>1</sup>, Ziyao Liu<sup>1</sup>, Abdur Rauf<sup>2\*</sup>, Sami Bawazeer<sup>3</sup> and Hafiz Ansar Rasul Suleria<sup>1\*</sup>

<sup>1</sup>School of Agriculture and Food, Faculty of Veterinary and Agricultural Sciences, The University of Melbourne, Parkville, VIC 3010, Australia

<sup>2</sup>Department of Chemistry, University of Swabi, Swabi, Anbar-23561 KPK, Pakistan

<sup>3</sup>Department of Pharmacognosy, Faculty of Pharmacy, Umm Al-Qura University, Makkah, P.O. Box 42, Kingdom of Saudi Arabia

**\*Corresponding authors Email:** [hafiz.suleria@unimelb.edu.au](mailto:hafiz.suleria@unimelb.edu.au); [abdurrauf@uoswabi.edu.p](mailto:abdurrauf@uoswabi.edu.p)

(a)

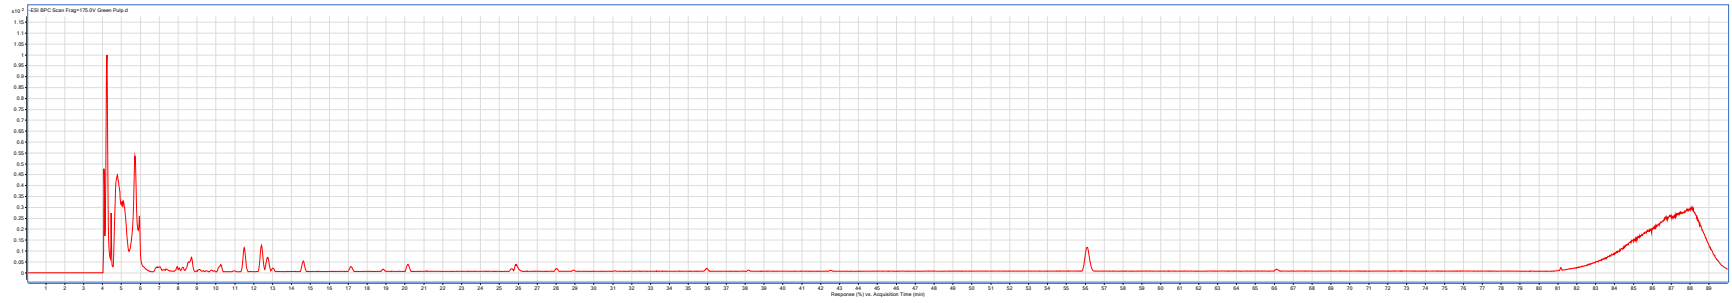

(b)

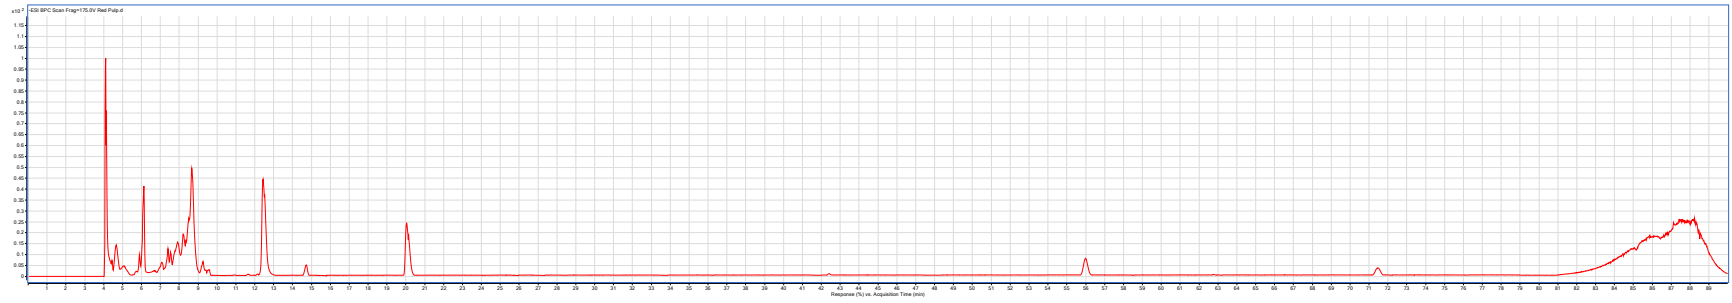

(c)

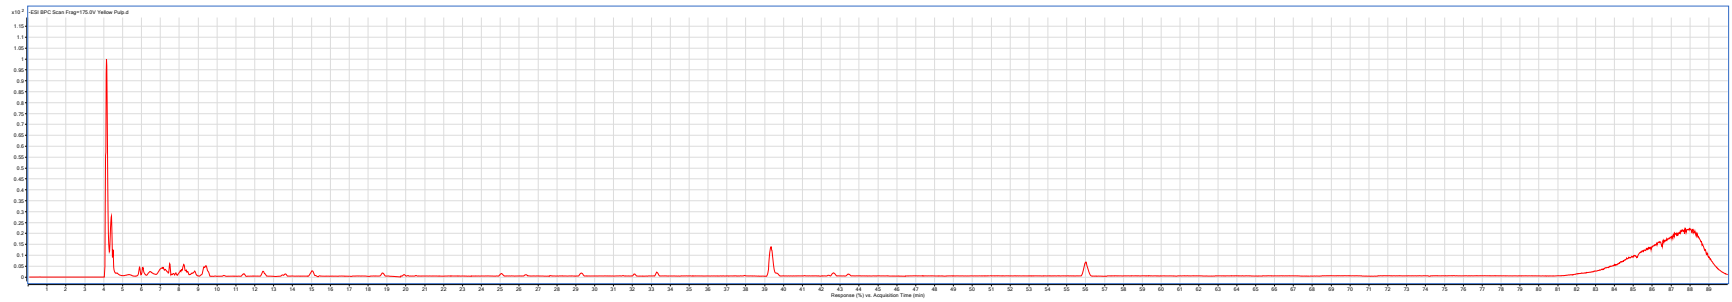

(d)

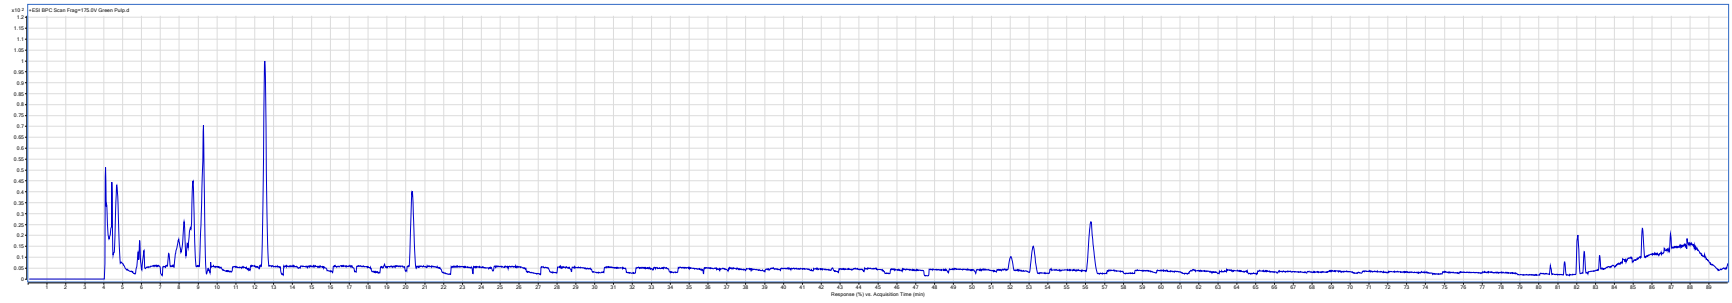

(e)

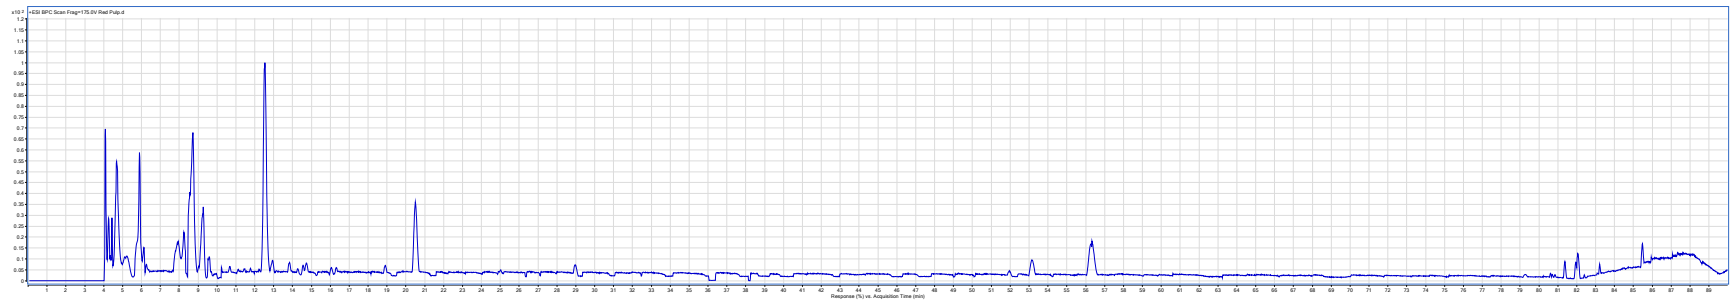

(f)

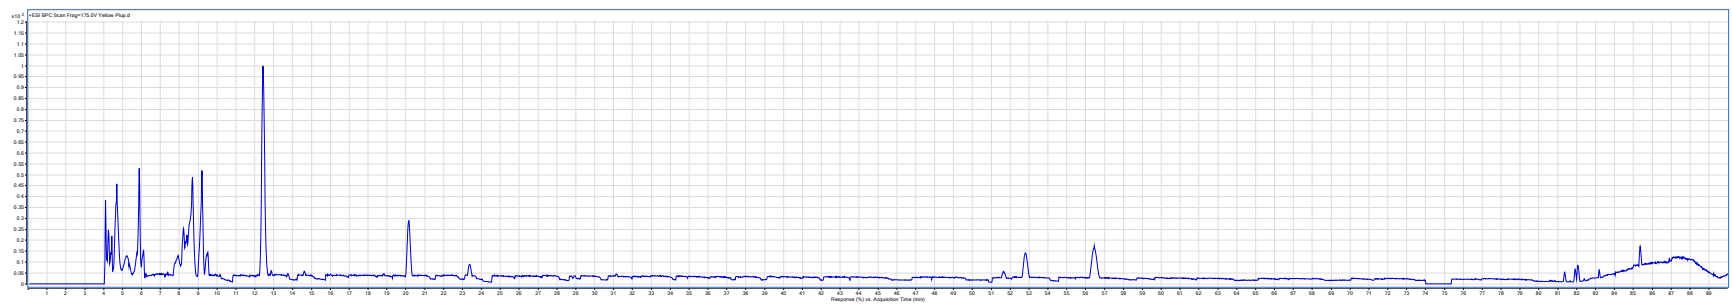

(g)

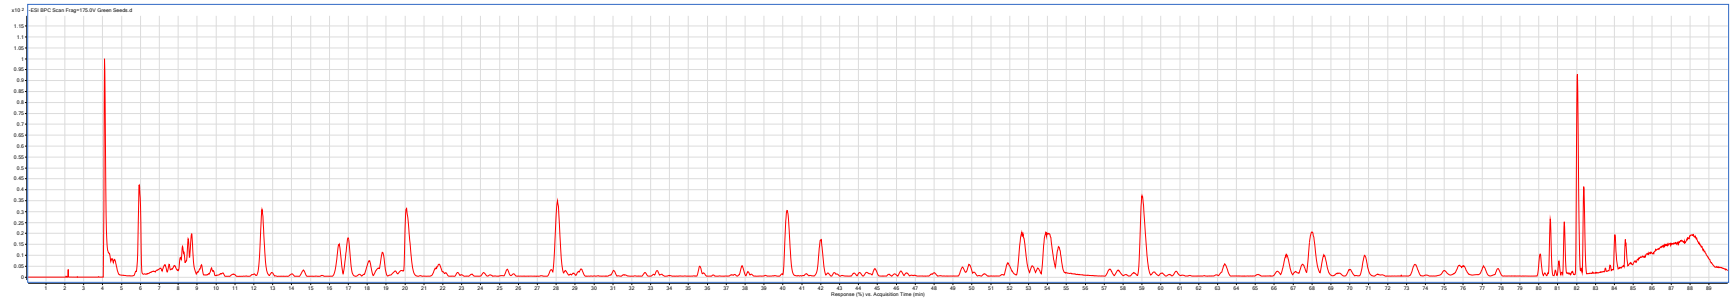

(h)

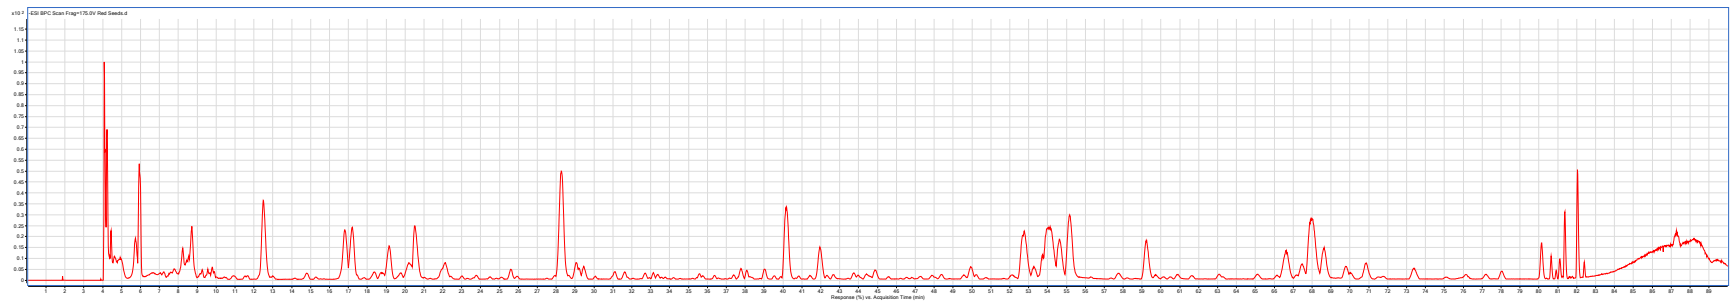

(i)

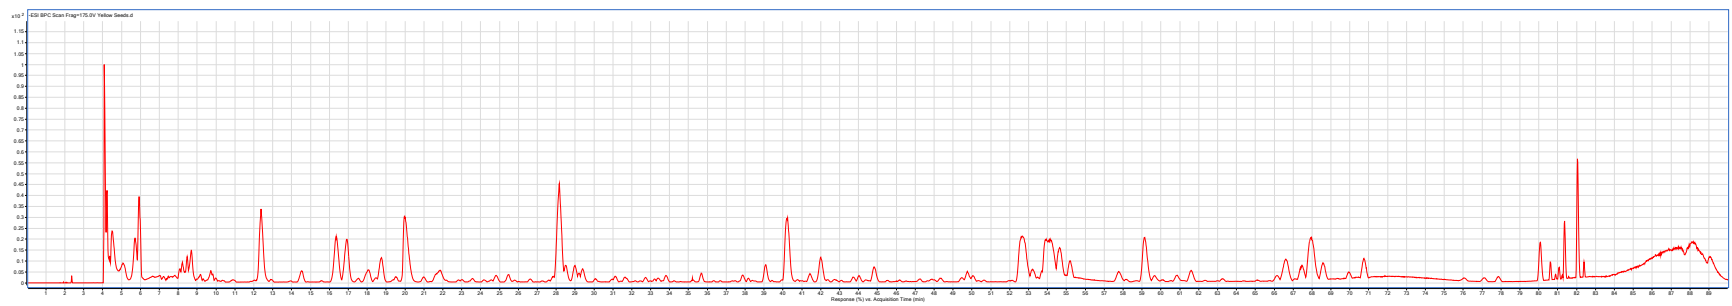

(j)

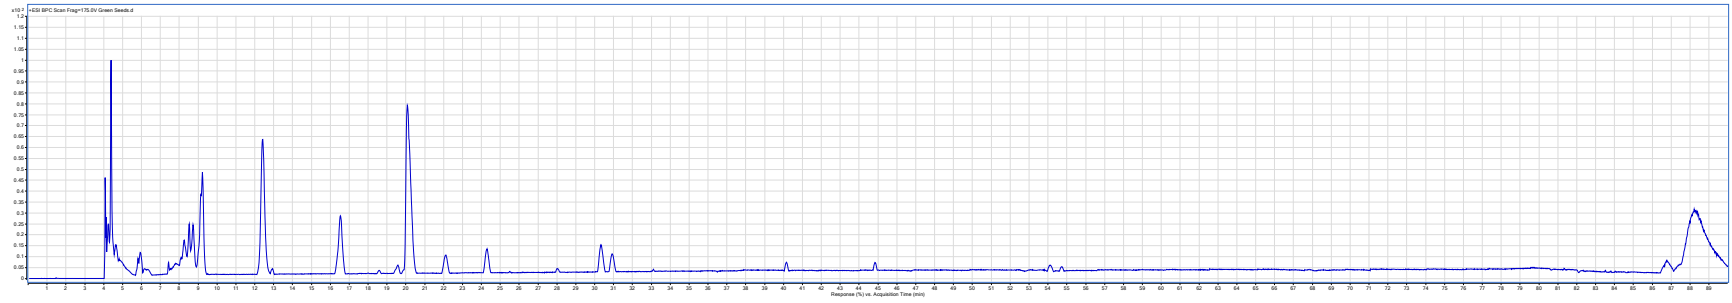

(k)

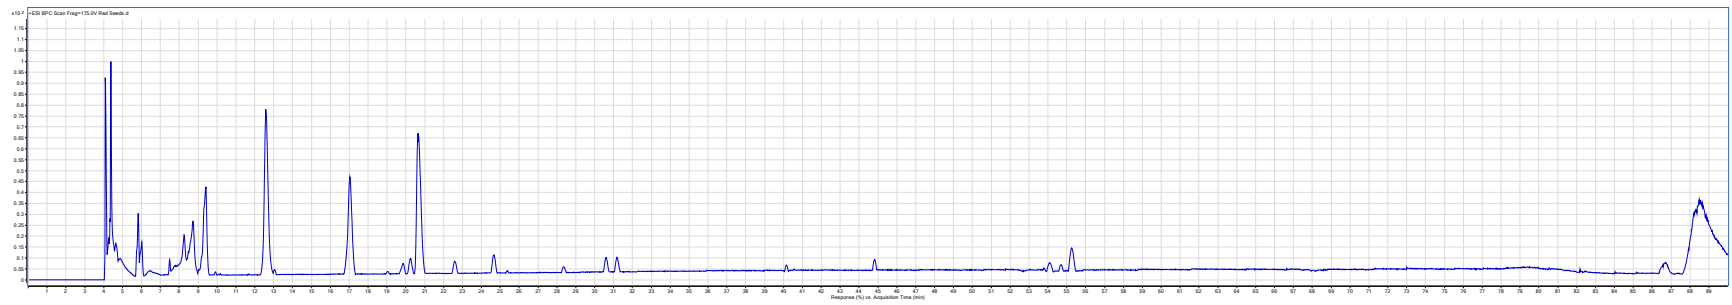

(l)

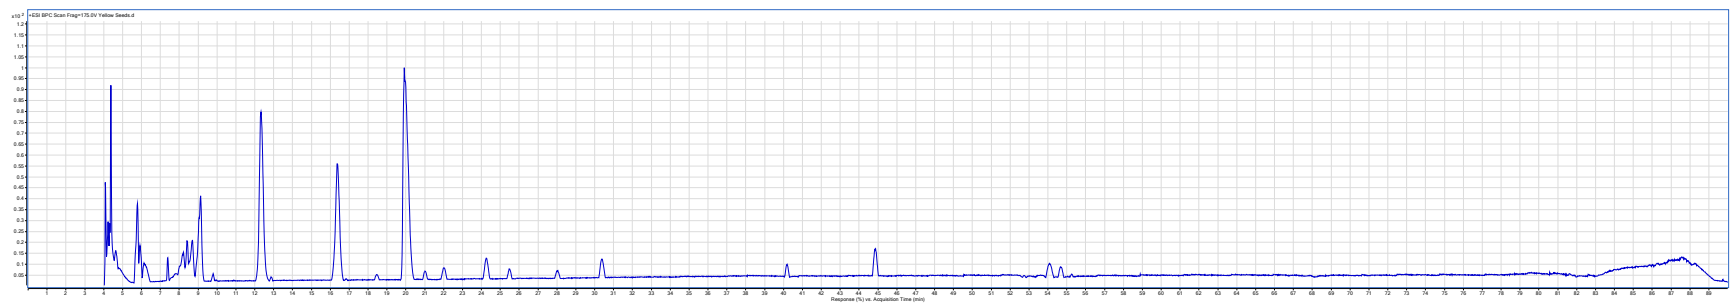

**Figure S1:** LC-ESI-QTOF-MS/MS basic peak chromatograph (BPC) for characterization of phenolic compounds of Australian grown bell peppers; **(a)** The pulp of green bell pepper in negative ionization mode; **(b)** The pulp of red bell pepper in negative ionization mode; **(c)** The pulp of yellow bell pepper in negative ionization mode; **(d)** The pulp of green bell pepper in positive ionization mode; **(e)** The pulp of red bell pepper in positive ionization mode; **(f)** The pulp of yellow bell pepper in positive ionization mode; **(g)** The seed of green bell pepper in negative ionization mode; **(h)** The seed of red bell pepper in negative ionization mode; **(i)** The seed of yellow bell pepper in negative ionization mode; **(j)** The seed of green bell pepper in positive ionization mode; **(k)** The seed of red bell pepper in positive ionization mode; **(l)** The seed of yellow bell pepper in positive ionization mode.
